# Supplementary material for: The Vertebrate RCAN Gene Family: Novel Insights into Evolution, Structure and Regulation
Source: PLoS One. 2014 Jan 20;9(1):e85539. doi: 10.1371/journal.pone.0085539 (PMC3896409; doi:10.1371/journal.pone.0085539)
Supplement: Table S2 — Previous and novel nomenclature for RCAN3 exons, mRNA forms and protein isoforms. (XLSX) [file pone.0085539.s008.xlsx]

## Sheet: Table S2
Table S2. Previous and novel nomenclature for RCAN3 exons, mRNA forms and protein isoforms.
RCAN3 exon usage (previous nomenclature)a		RefSeq database*		Davies**		Facchin***		Serrano****		RCAN3 exon usage (novel nomenclature)b
mRNA	PROTEIN	mRNA	PROTEIN	mRNA	PROTEIN	mRNA	PROTEIN	mRNA	PROTEIN	mRNA	PROTEIN
1a,2,3,4,5	2,3,4,5	transcript variant 4 (NM_001251979)	isoform 1 (NP_001238906, NP_038469, NP_001238907, NP_001238908)	RCAN3-2	RCAN3-2	RCAN3-1a,2,3,4,5	RCAN3-2,3,4,5	RCAN3-1	RCAN3-4	1,4,5,6,7	4,5,6,7
1,2,3,4,5		transcript variant 1 (NM_013441)		-	-	RCAN3-1,2,3,4,5		RCAN3-2		2,4,5,6,7
1c,2,3,4,5		transcript variant 2 NM_001251977		-	-	RCAN3-1c,2,3,4,5		RCAN3-2a		2a,4,5,6,7
1b,2,3,4,5		transcript variant 3 (NM_001251978)		-	-	RCAN3-1b,2,3,4,5		RCAN3-3		3,4,5,6,7
2,3,4b,5	2,3,4b,5	transcript variant 5 (NM_001251980)	isoform 2 (NP_001238909)	RCAN3-4b	RCAN3-4b (RCAN3-2,3,4b,5)	RCAN3-2,3,4b,5	RCAN3-2,3,4b,5	RCAN3-4,5,6a,7	RCAN3-4,5,6a,7	4,5,6a,7	4,5,6a,7
2,3,5	2,3,5	transcript variant 7 (NM_001251982)	isoform 4 (NP_001238911)	-	-	RCAN3-2,3,5	RCAN3-2,3,5	RCAN3-4,5,7	RCAN3-4,5,7	4,5,7	4,5,7
2.5	2.5	transcript variant 10 (NM_001251985)	isoform 6 (NP_001238914)	RCAN3-2,5	RCAN3-2,5	RCAN3-2,5	RCAN3-2,5	RCAN3-4,7	RCAN3-4,7	4.7	4.7
1c,2,4,5	2,4,5	transcript variant 6 (NM_001251981)	isoform 3 (NP_001238910)	-	-	RCAN3-1c,2,4,5	RCAN3-2,4,5	RCAN3-2a,4,6,7	RCAN3-4,6,7	2a,4,6,7	4,6,7
1,3,4,5	4.5	transcript variant 8 (NM_001251983)	isoform 5 (NP_001238912, NP_001238913)	-	-	RCAN3-1,3,4,5	RCAN3-4,5	RCAN3-2,5,6,7	RCAN3-6,7	2,5,6,7	6.7
1a,3,4,5		transcript variant 9 (NM_001251984)		-		RCAN3-1a,3,4,5		RCAN3-1,5,6,7		1,5,6,7
a The previous exon numbering of RCAN3 used in Davies (**) and Facchin (***).
b The novel exon numbering of RCAN3 proposed in this manuscript (****) (Figure 3).
* Pruitt KD, Tatusova T, Brown GR, Maglott DR (2012) NCBI Reference Sequences (RefSeq): current status, new features and genome annotation policy. Nucleic Acids Res 40: D130-135.
** Facchin F, Canaider S, Vitale L, Frabetti F, Griffoni C, et al. (2008) Identification and analysis of human RCAN3 (DSCR1L2) mRNA and protein isoforms. Gene 407: 159-168.
*** Davies KJ, Ermak G, Rothermel BA, Pritchard M, Heitman J, et al. (2007) Renaming the DSCR1/Adapt78 gene family as RCAN: regulators of calcineurin. FASEB J 21: 3023-3028.
**** Novel nomenclature for RCAN3 mRNA forms and protein isoforms by Serrano et al. (2013) proposed in this manuscript.
